# Supplementary material for: A single-cell atlas and lineage analysis of the adult Drosophila ovary
Source: PubMed Central journal article supplement (PMC7648648; doi:10.1038/s41467-020-19361-0), 2020-11-06
Supplement: 41467_2020_19361_MOESM1_ESM.pdf [file 41467_2020_19361_MOESM1_ESM.pdf]

## **Supplementary Information**

### **A Single-Cell Atlas and Lineage Analysis of the Adult *Drosophila* Ovary**

Katja Rust<sup>1,2,5</sup>, Lauren E. Byrnes<sup>1,3</sup>, Kevin Shengyang Yu<sup>4</sup>, Jason S. Park<sup>4</sup>, Julie B. Sneddon<sup>1,3,5,6</sup>, Aaron D. Tward<sup>4</sup>, Todd G. Nystul<sup>1,2,\*</sup>

<sup>1</sup>UCSF, Department of Anatomy, 513 Parnassus Ave, San Francisco, CA, 94143

<sup>2</sup>UCSF, Department of OB-GYN/RS, 513 Parnassus Ave, San Francisco, CA, 94143

<sup>3</sup>UCSF, Department of Cell and Tissue Biology, 513 Parnassus Ave, San Francisco, CA, 94143

<sup>4</sup>UCSF, Department of Otolaryngology-Head and Neck Surgery, 513 Parnassus Ave, San Francisco, CA, 94143

<sup>5</sup>Broad Center of Regeneration Medicine and Stem Cell Research, 513 Parnassus Ave, San Francisco, CA, 94143

<sup>6</sup>UCSF, Diabetes Center, 513 Parnassus Ave, San Francisco, CA, 94143

\*Corresponding author: todd.nystul@ucsf.edu

#### **Contents:**

Supplementary Figures 1-10

Supplementary Tables 1-3

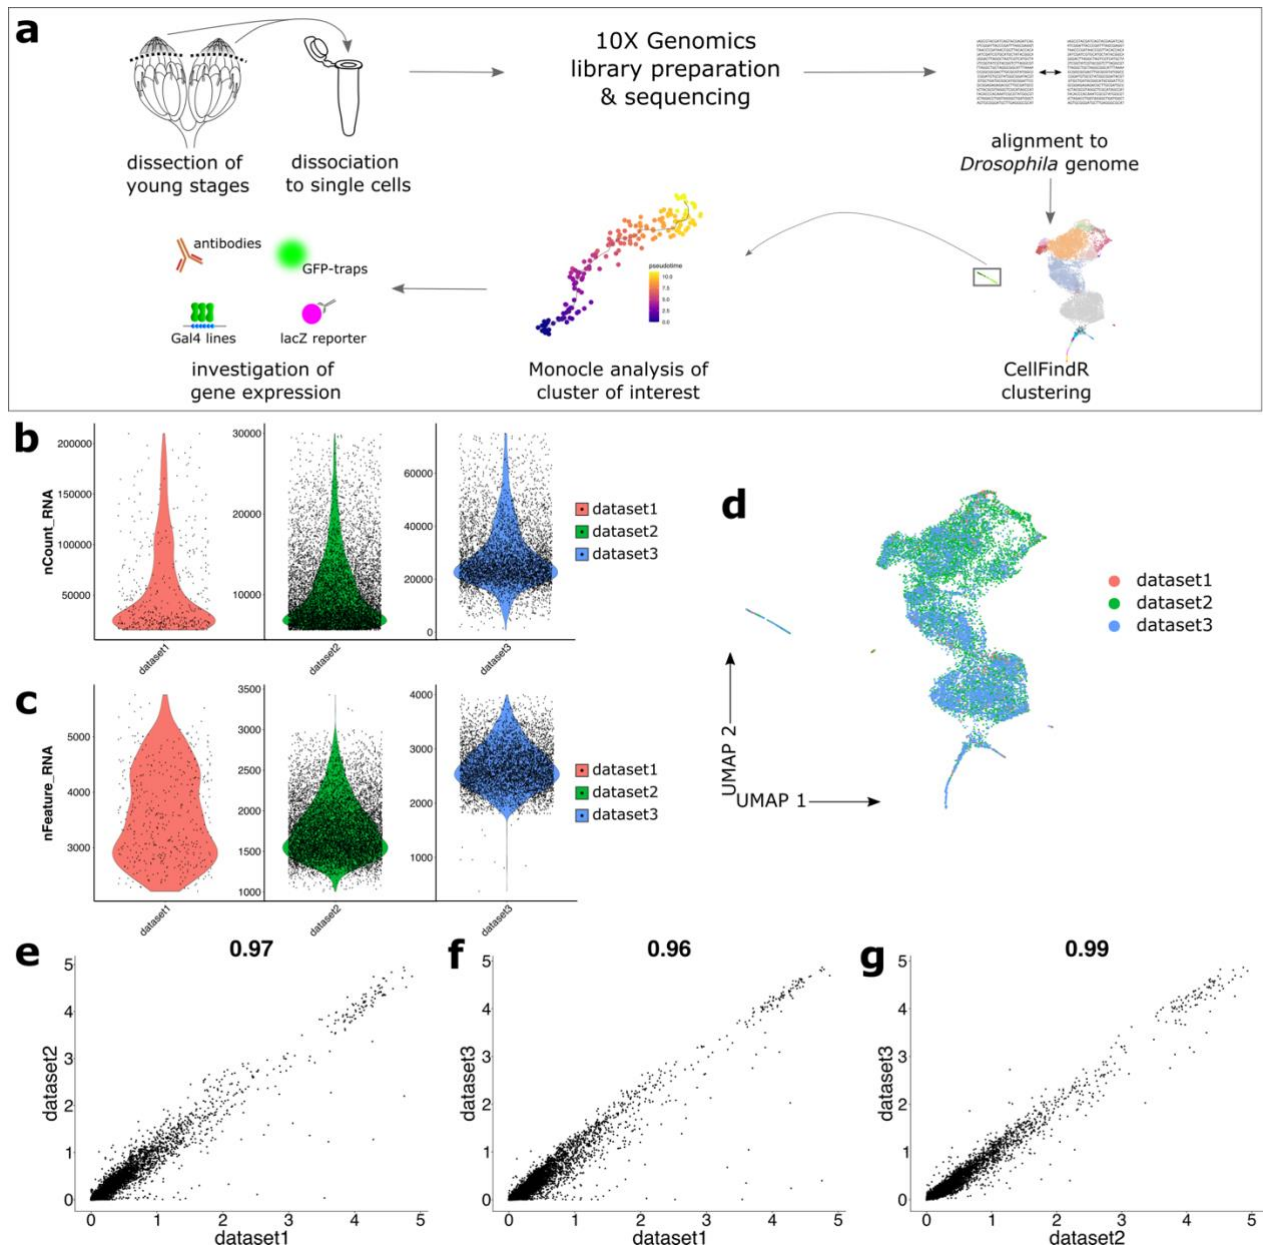

**Supplementary Figure 1: scRNA-seq dataset quality and comparison of Seurat and CellFindR**

a) Schematic overview of sample preparation for single-cell sequencing. b-c) Violin plots summarizing the number of high quality cells and the filter settings for each dataset. d) UMAP plot showing the distribution of each dataset across each cluster. e-g) Pairwise Pearson correlations of gene expression levels indicates strong correlations between the three datasets.

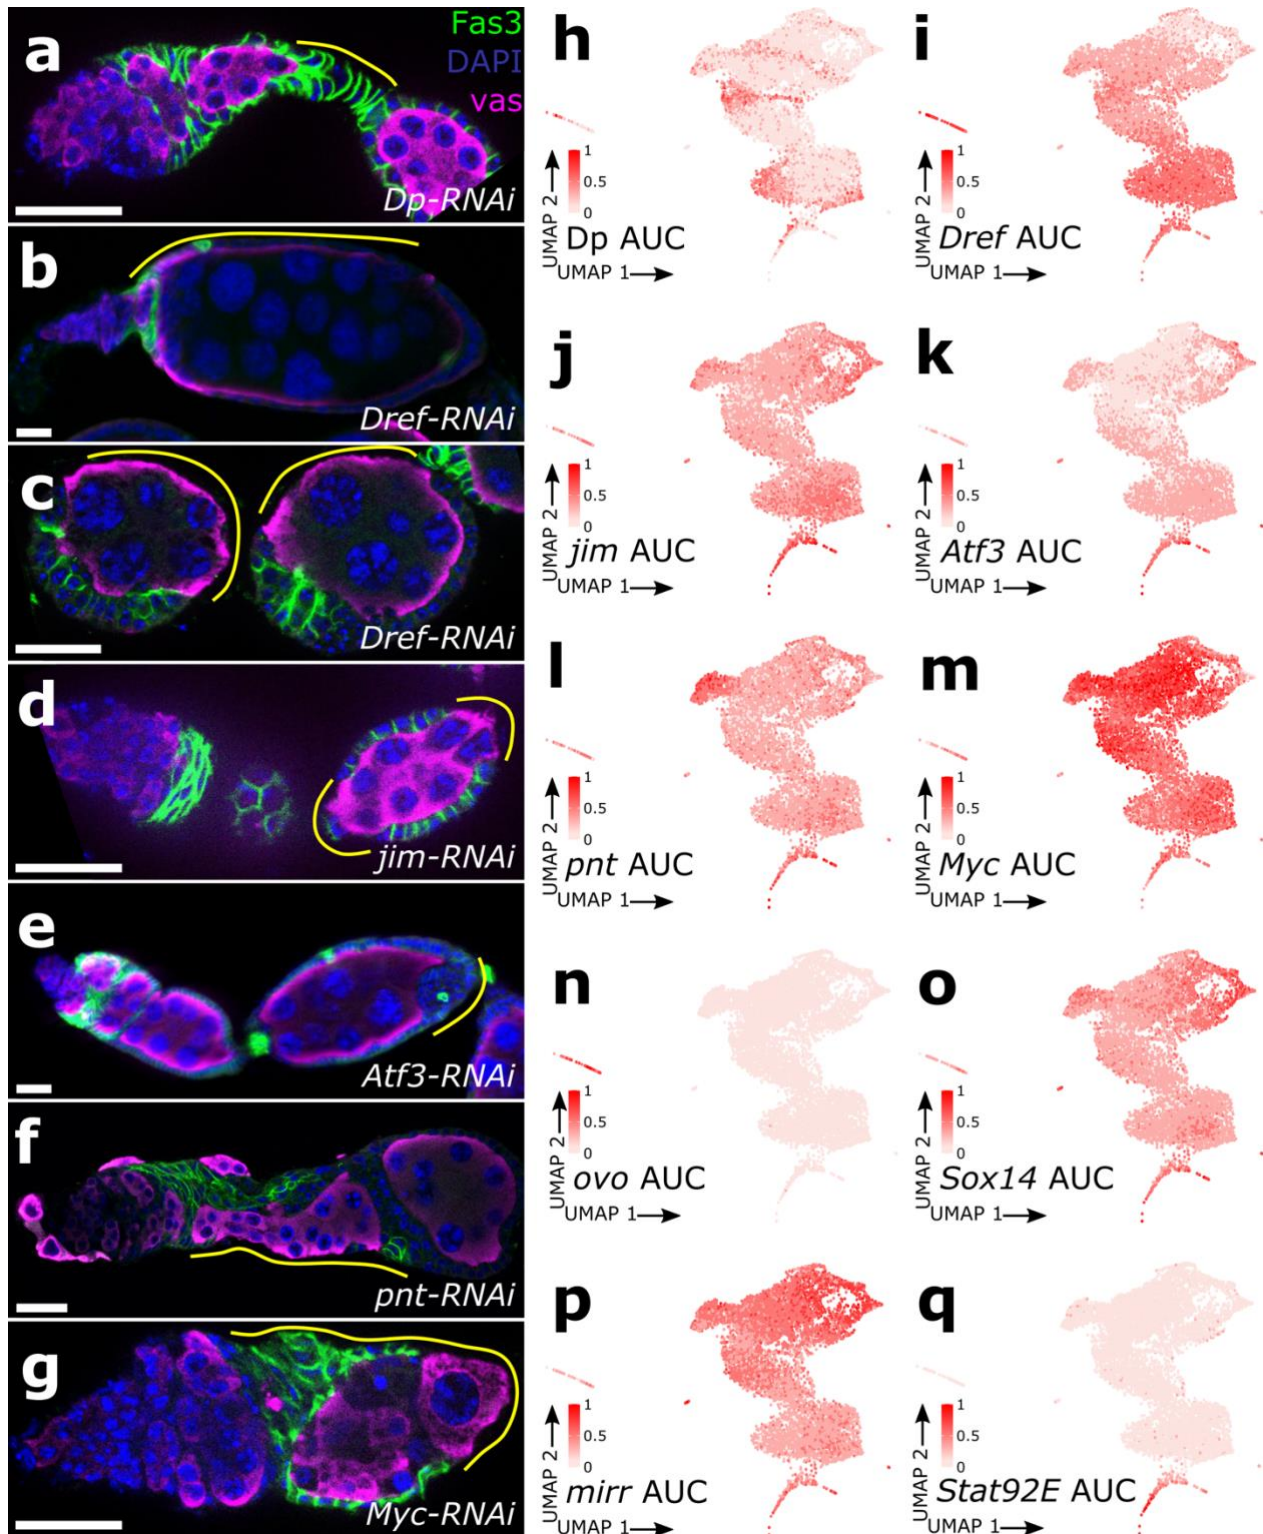

**Supplementary Figure 2: SCENIC identifies transcription factors that are required for oogenesis**

a-g) To validate predictions from SCENIC, we selected a subset of regulons with different patterns of activity across the dataset and used 109-30-Gal4; tub-Gal80ts to drive expression of the corresponding transcription factor specifically during adulthood in the early follicle cell lineage and stained ovarioles for Fas3 (green),

vasa (magenta), and DAPI (blue). Representative examples of ovarioles with significant morphological defects (yellow line) are shown. Interestingly, although Myc transcript is not detected in the early follicle cell lineage, SCENIC predicts that the Myc regulon is highly active and, indeed, we observe a strong morphological phenotype upon RNAi knockdown of Myc in these cells suggesting that the gene is expressed in these cells but at a level that is too low to be detected in our scRNA-seq dataset. Scale bars = 20  $\mu$ m.

h-m) The pattern of regulon activity corresponding to each of the transcription factors tested in a-g in dataset2. Scale bars show the percent of regulon activity.

n-q) Dataset2 UMAP plot examples of additional regulons with patterns of activity that align with expectations. The regulon for ovo, which is required for germ cell survival and differentiation,<sup>1</sup> is active in germ cell clusters (n). Likewise, the regulons for Sox14, which we identify as a novel marker of late-stage follicle cells (Fig. 7), and mirr, which is a marker of central follicle cells in mid-oogenesis are active in the corresponding clusters (p-q). Stat92E regulon activity is high in early follicle cells and stalk cells consistent with the importance of JAK-STAT signaling in these cell types<sup>2,3</sup> (q). Scale bars show the percent of regulon activity. AUC: Area under the curve.





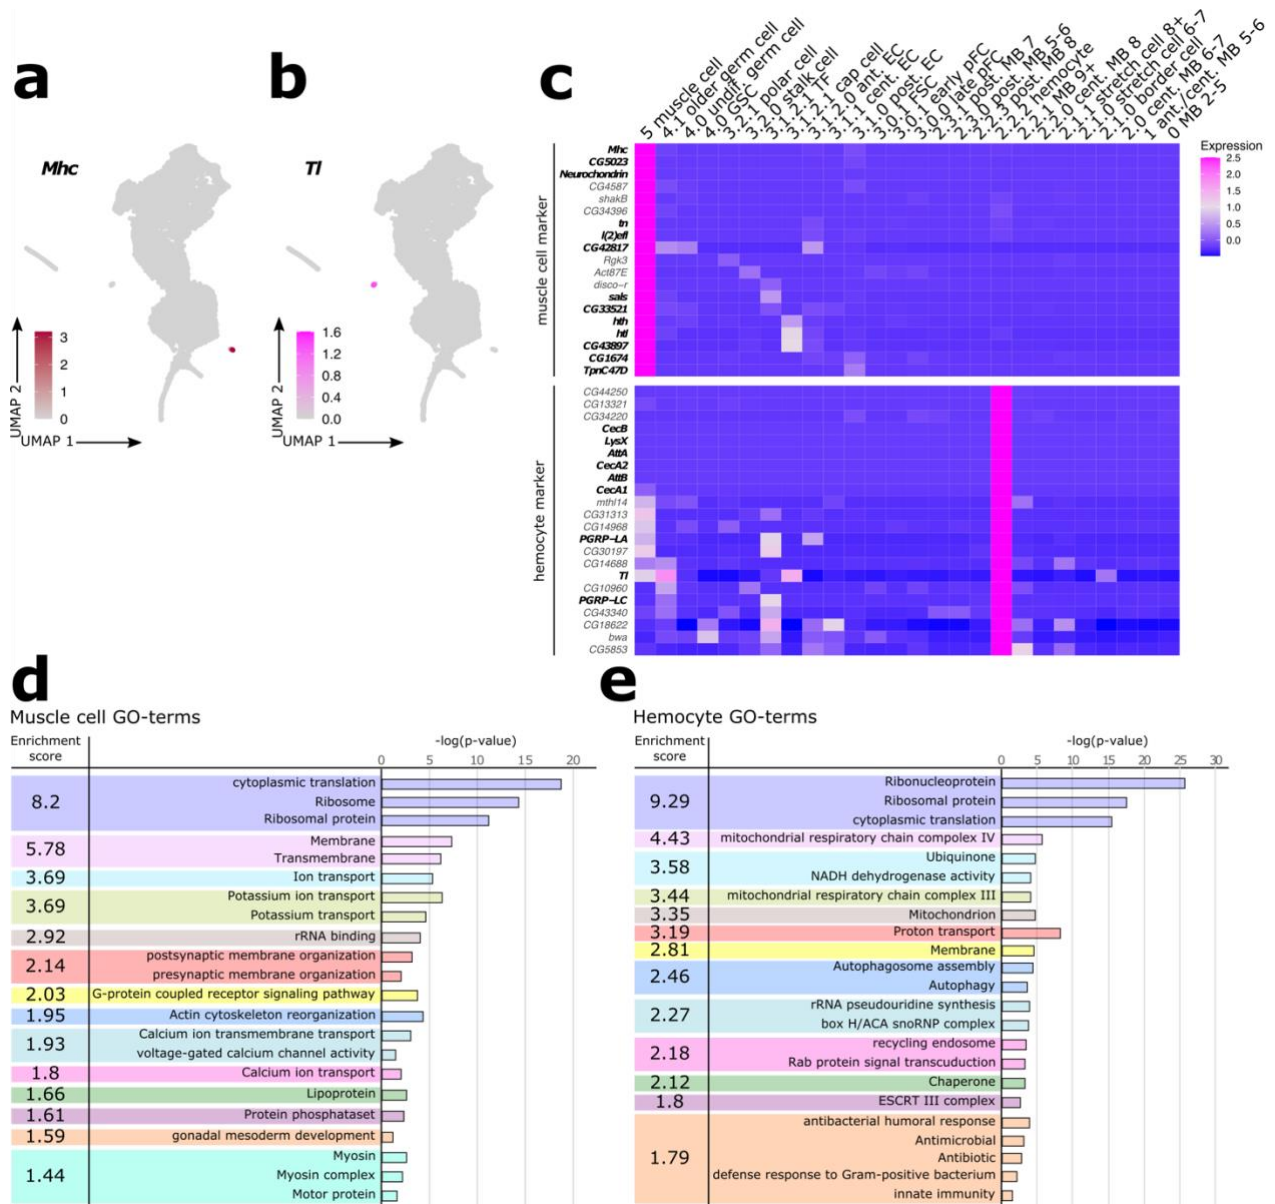

**Supplementary Figure 4: Muscle cell and hemocytes**

a-b) UMAP plots showing the expression of the muscle cell marker, *Mhc* (A) or the hemocyte marker, *Tl* (b). c) Heat map showing the expression of muscle cell and hemocyte markers across the entire dataset. Bolded gene names indicate genes with a confirmed function in the corresponding cell type; non-bolded gene names are candidate novel markers. d-e) Tables showing the enrichment scores and p-values of GO-terms that are enriched in muscle cells (d) and hemocytes (e). undif.: undifferentiated; GSC: germline stem cell; TF: terminal filament; EC: escort cell; ant.: anterior; cent.: central; post.: posterior; FSC: follicle stem cell; pFC: prefollicle cell; MB: main body follicle cell.

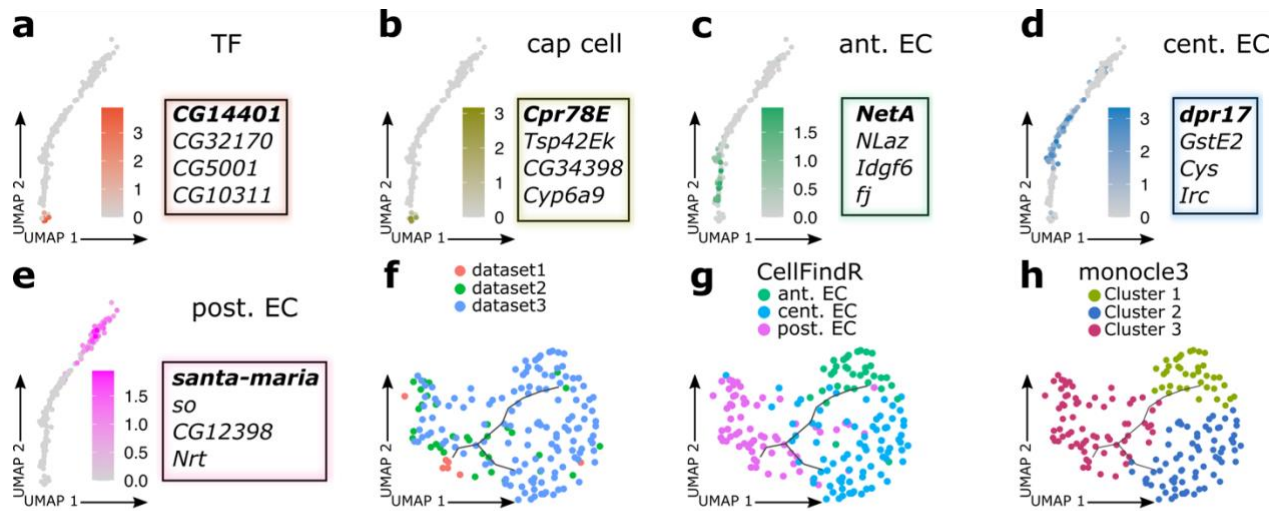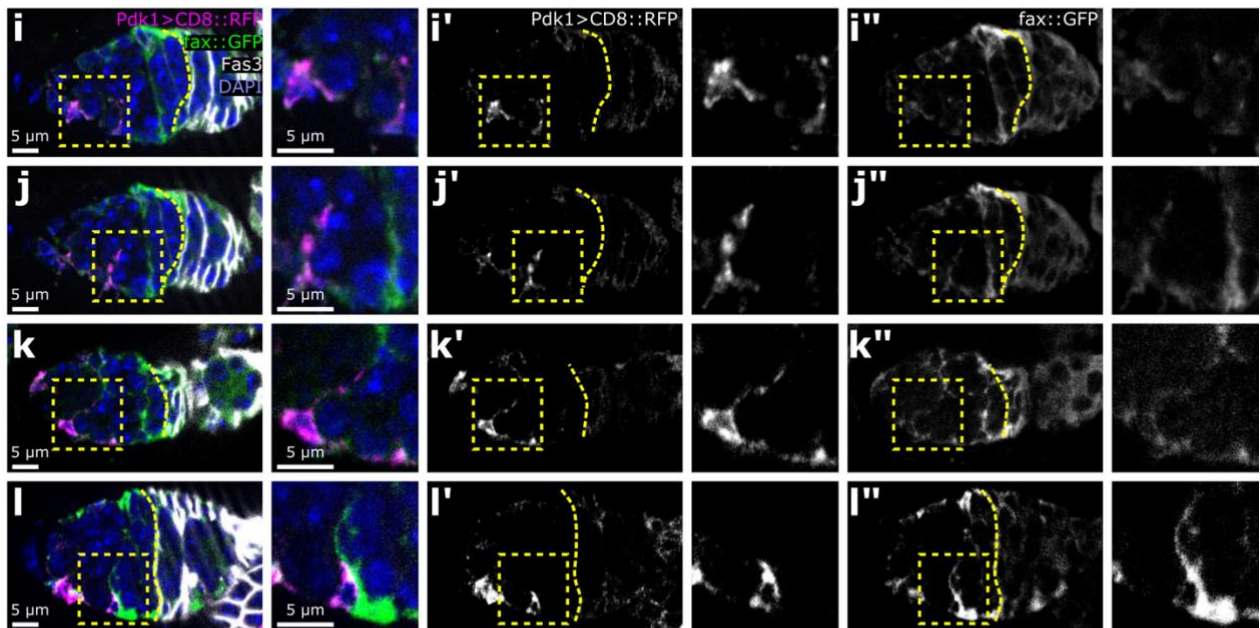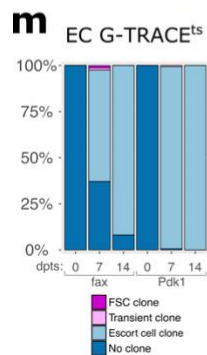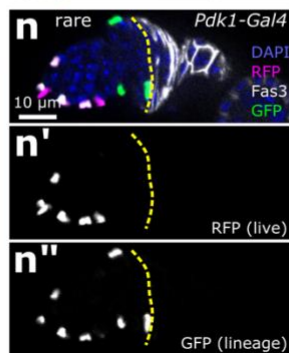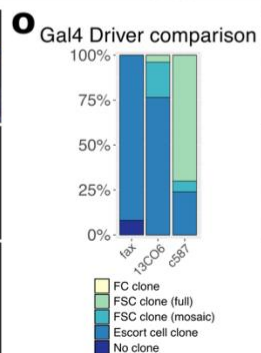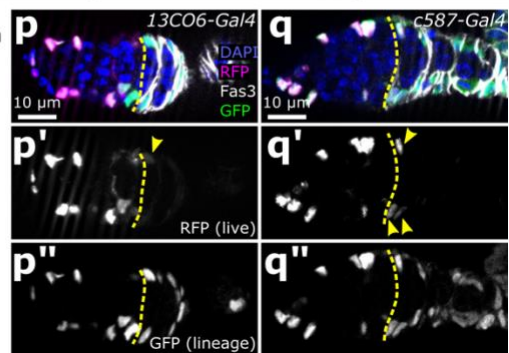

## Supplementary Figure 5: Markers, monocle3 analysis, and *in vivo* validation of anterior germarial somatic cells

a-e) UMAP plots of anterior germarial somatic cells showing marker expression pattern for each cluster. Marker in bold is shown on plot. Additional markers are listed below. f-h) UMAP plots showing pseudotime trajectory of ECs generated with monocle3. Datasets are distributed across the trajectory (f). CellFindR and monocle3 clusters align well (g-h). i-l) Germaria with *fax::GFP* and *Pdk1-Gal4* driving *CD8::RFP* stained for RFP (magenta), GFP (green), Fas3 (white), and DAPI (blue). i'-l') *CD8::RFP* (white). i''-l'') *fax::GFP* (white). *Pdk1-Gal4* is expressed in ECs with short protrusions (i'-l') but not in posterior ECs with long protrusions (i''-l''). Yellow dotted line demarks the Region 2a/2b border. Boxed region is enlarged on the left. m) Quantification of ovarioles without GFP<sup>+</sup> cells (no clone), only GFP<sup>+</sup> ECs (Escort cell clone), or GFP<sup>+</sup> ECs with transient follicle cell clones (Transient clone) or FSC clones (FSC clone) in germaria with *fax-Gal4* or *Pdk1-Gal4* driving G-TRACE<sup>ts</sup> well-fed for 0, 7, or 14 days before dissection. n = 167, 167, and 170 ovarioles for *fax-Gal4* at 0, 7, and 14 dpts, respectively. 113, 159, 134 ovarioles for *Pdk1-Gal4* at 0, 7, and 14 dpts, respectively. Note that ovarioles with follicle cell clones derived from a single fly. n) Rare germarium with *Pdk1-Gal4* driving G-TRACE<sup>ts</sup> with GFP<sup>+</sup> cells at the Region 2a/2b border. Germarium is stained for RFP (magenta), GFP (green), Fas3 (white) and DAPI (blue). n') RFP (white). n'') GFP (white). Yellow line demarks the Region 2a/2b border. o) Frequencies of each clone type produced by *fax-Gal4*, *13C06-Gal4*, and *c587-Gal4* driving G-TRACE<sup>ts</sup> at well-fed conditions for 14 days before dissection. n = 170, 51, and 50 ovarioles for *fax-Gal4*, *13C06-Gal4*, and *c587-Gal4*, respectively. p-q) Germaria expressing GTRACE<sup>ts</sup> under control of *13C06-Gal4* (p) or *c587-Gal4* (q) stained for RFP (magenta), GFP (green), Fas3 (white) and DAPI (blue). p'-q') RFP staining (white). p''-q'') GFP staining (white). Yellow line outlines the 2a/2b border. Arrows point at RFP<sup>+</sup> follicle cells showing expression is not restricted to ECs. TF: terminal filament; EC: escort cell; ant.: anterior; cent.: central; post.: posterior; dpts: days post temperature shift.



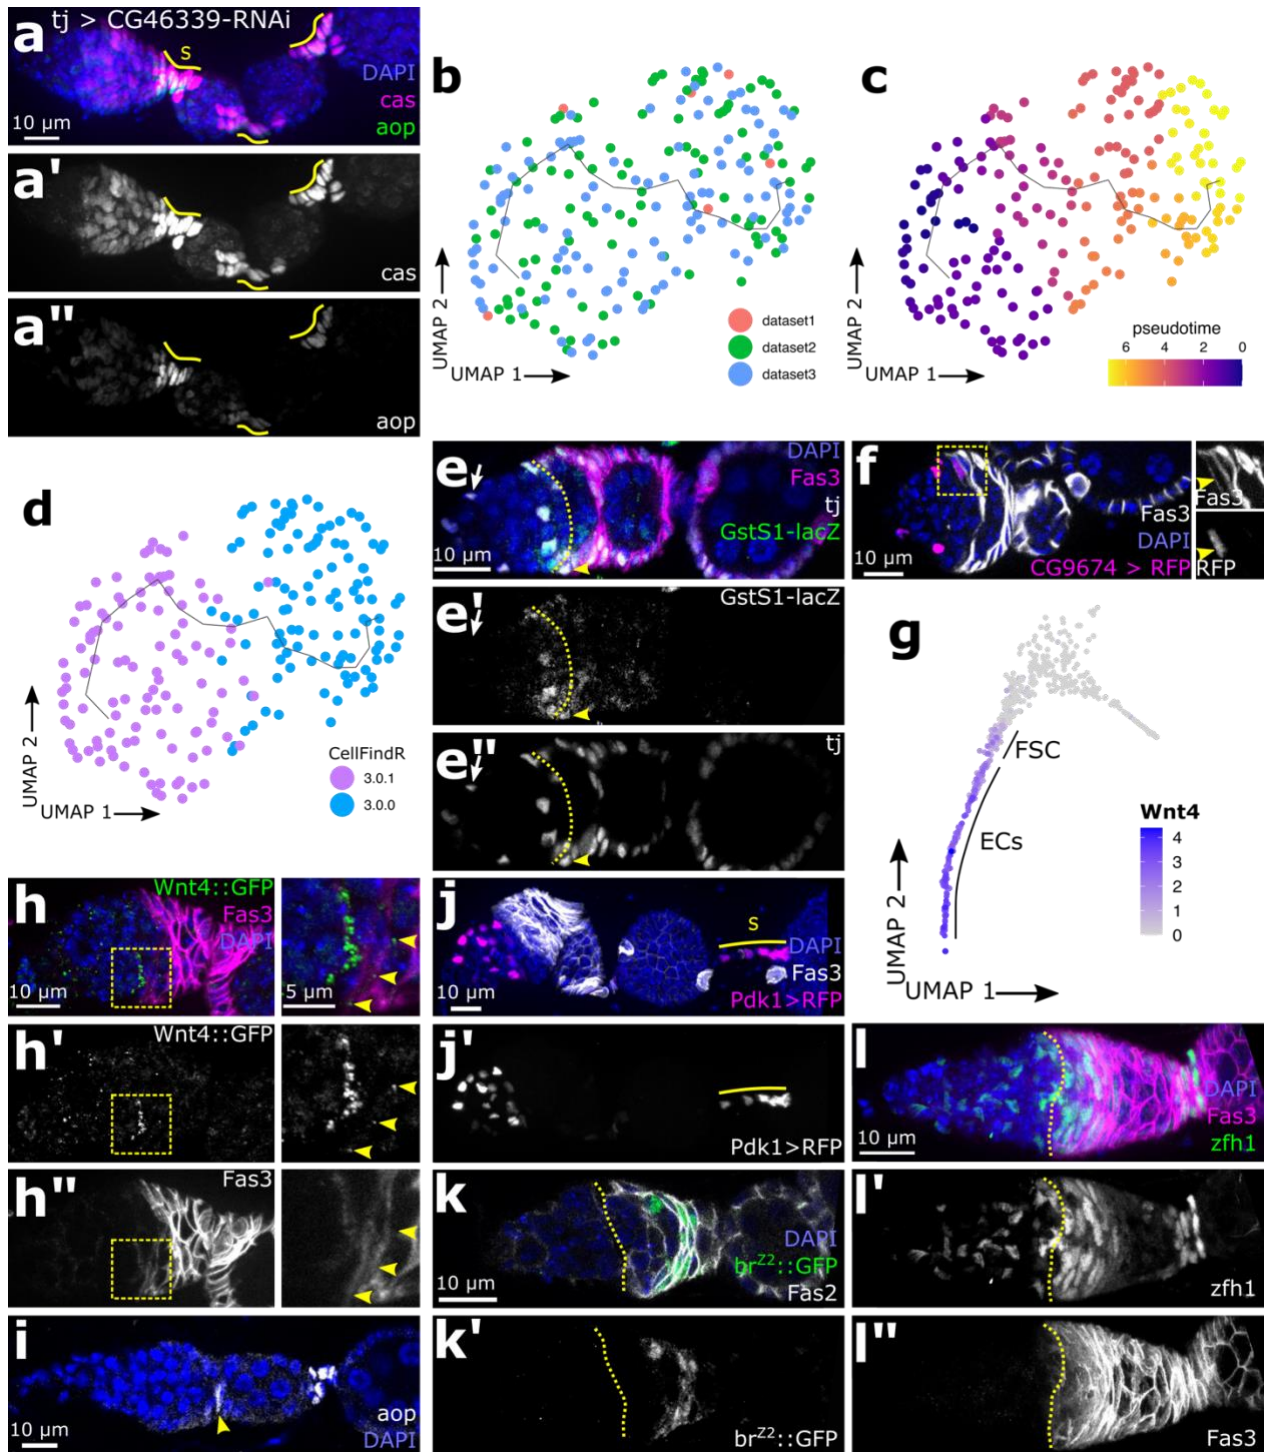

**Supplementary Figure 6: Markers of early stages in the FSC lineage**

a) Maximum intensity projection of germarium with *tj-Gal4* driving *CG46339-RNAi* stained for cas (magenta), aop (green) and DAPI (blue). a') cas (white). a'') aop (white). Stalks form properly and show normal cas and aop expression. b-d) UMAP plots showing follicle cell pseudotime trajectory. Datasets are distributed

across the trajectory (b). monocle3 sorts cells in cluster 3.0.1 containing FSCs and early pFCs at the beginning of pseudotime and cells in cluster 3.0.0 containing late pFCs later in pseudotime (c-d). e) *GstS1-LacZ* germarium stained for LacZ (green), Fas3 (magenta), tj (white) and DAPI (blue). e') *GstS1-lacZ* (white). e'') tj (white). *GstS1* is expressed in somatic cells at Region 2a/2b border, including pECs, FSCs (arrowhead), and early pFCs. f) Germarium with *CG9674-Gal4* driving RFP stained for RFP (magenta), Fas3 (white), and DAPI (blue). Insets: magnified view of indicated square in Fas3 and RFP channels (white). Arrowhead: RFP<sup>+</sup>, Fas3<sup>+</sup> cell. g-h) UMAP plot (g) showing *Wnt4* expression in ECs and FSCs, and *Wnt4::GFP* germarium stained for GFP (green), Fas3 (magenta), and DAPI (blue) (h). h') GFP (white). (h'') Fas3 (white). Arrowheads: GFP<sup>+</sup> puncta in Fas3 positive cells at the Fas3 border. i) Wildtype germarium stained for aop (white) and DAPI (blue) confirms aop expression in stalk cells and their precursors (arrowhead). j) Maximum intensity projection of a germarium with *Pdk1-Gal4* driving RFP stained for RFP (magenta), Fas3 (white), and DAPI (blue) showing *Pdk1-Gal4* expression in stalk cells (s). j') RFP (white). k) *br<sup>Z2</sup>-GFP* germarium stained for GFP (green), Fas3 (magenta), and DAPI (blue) reveals *br* expression in Region 3 pFCs. k') GFP (white). Note that an anti-BrC antibody<sup>6</sup> detecting the entire broad complex does not detect a signal in the germarium. l) Maximum intensity projection of a wildtype germarium stained for zfh-1 (green), Fas3 (magenta), and DAPI (blue). l') zfh1 (white). l'') Fas3 (white). zfh-1 is expressed weakly in anterior ECs and central ECs, strongly in posterior ECs, FSCs and prefollicle cells in Region 2b, but is expressed low or not detectable in Region 3. Yellow line: Region 2a/2b border. FSC: follicle stem cell; EC: escort cell.

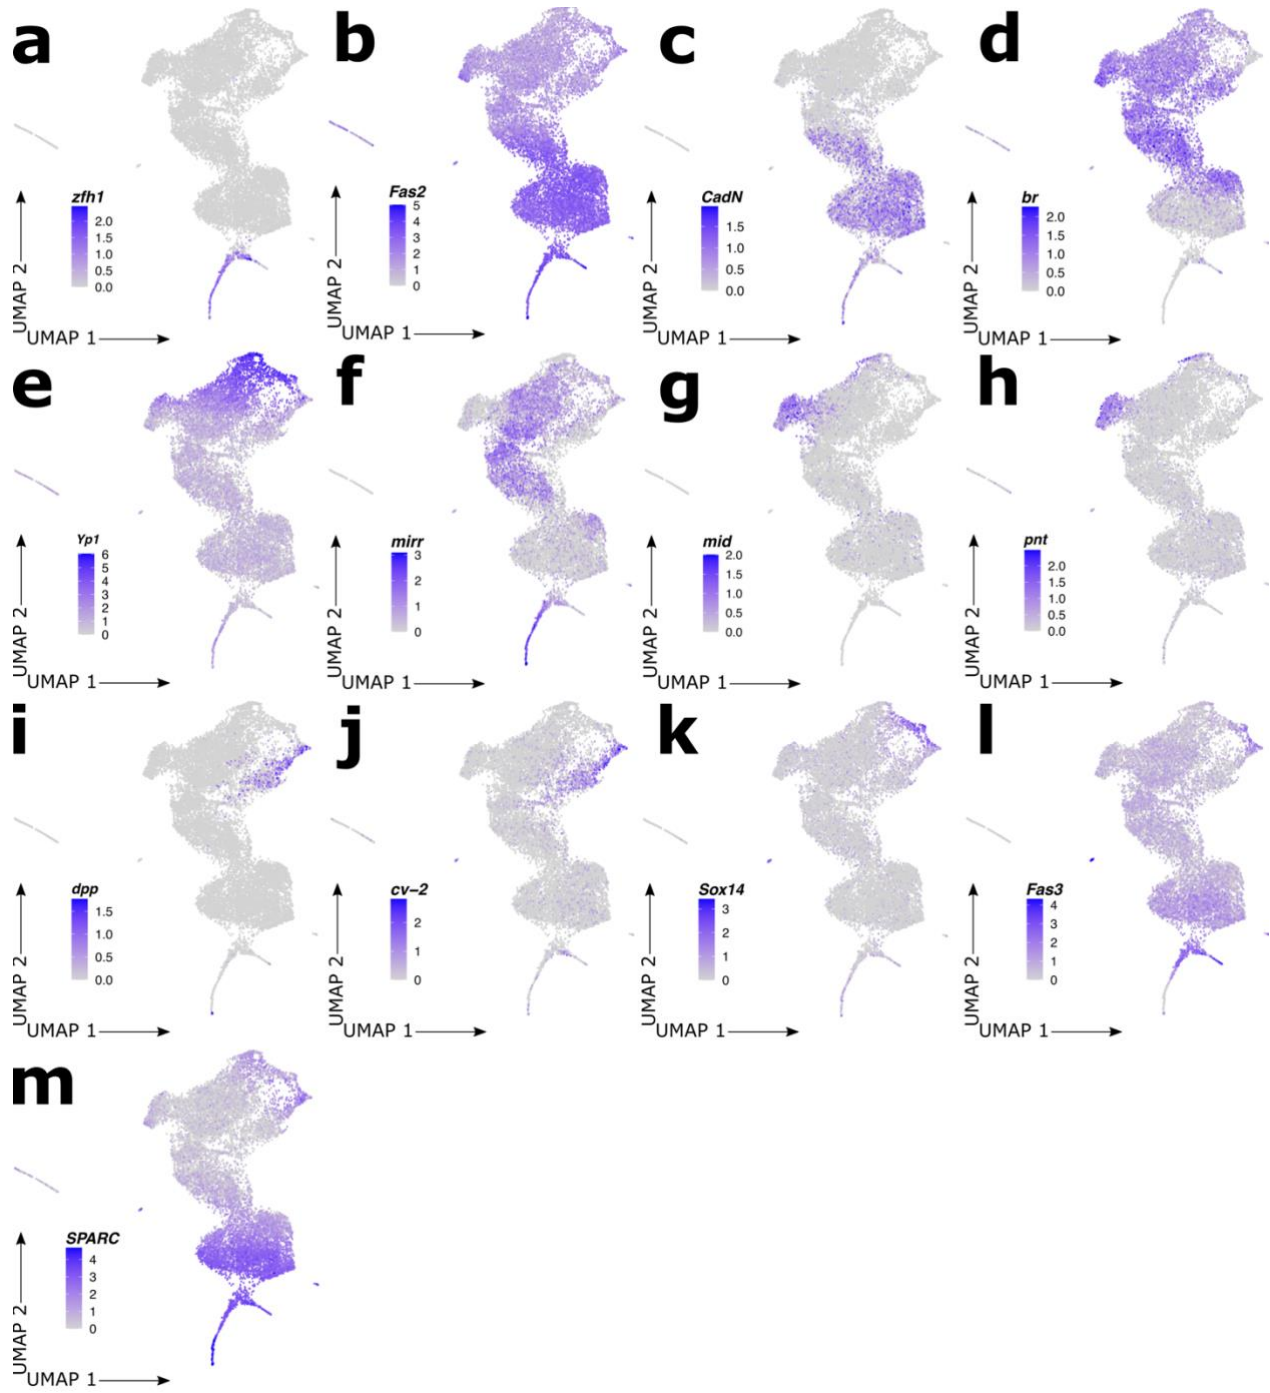

**Supplementary Figure 7: Markers of main body cell populations and their derivatives**

a-m) UMAP plots of selected markers as indicated.

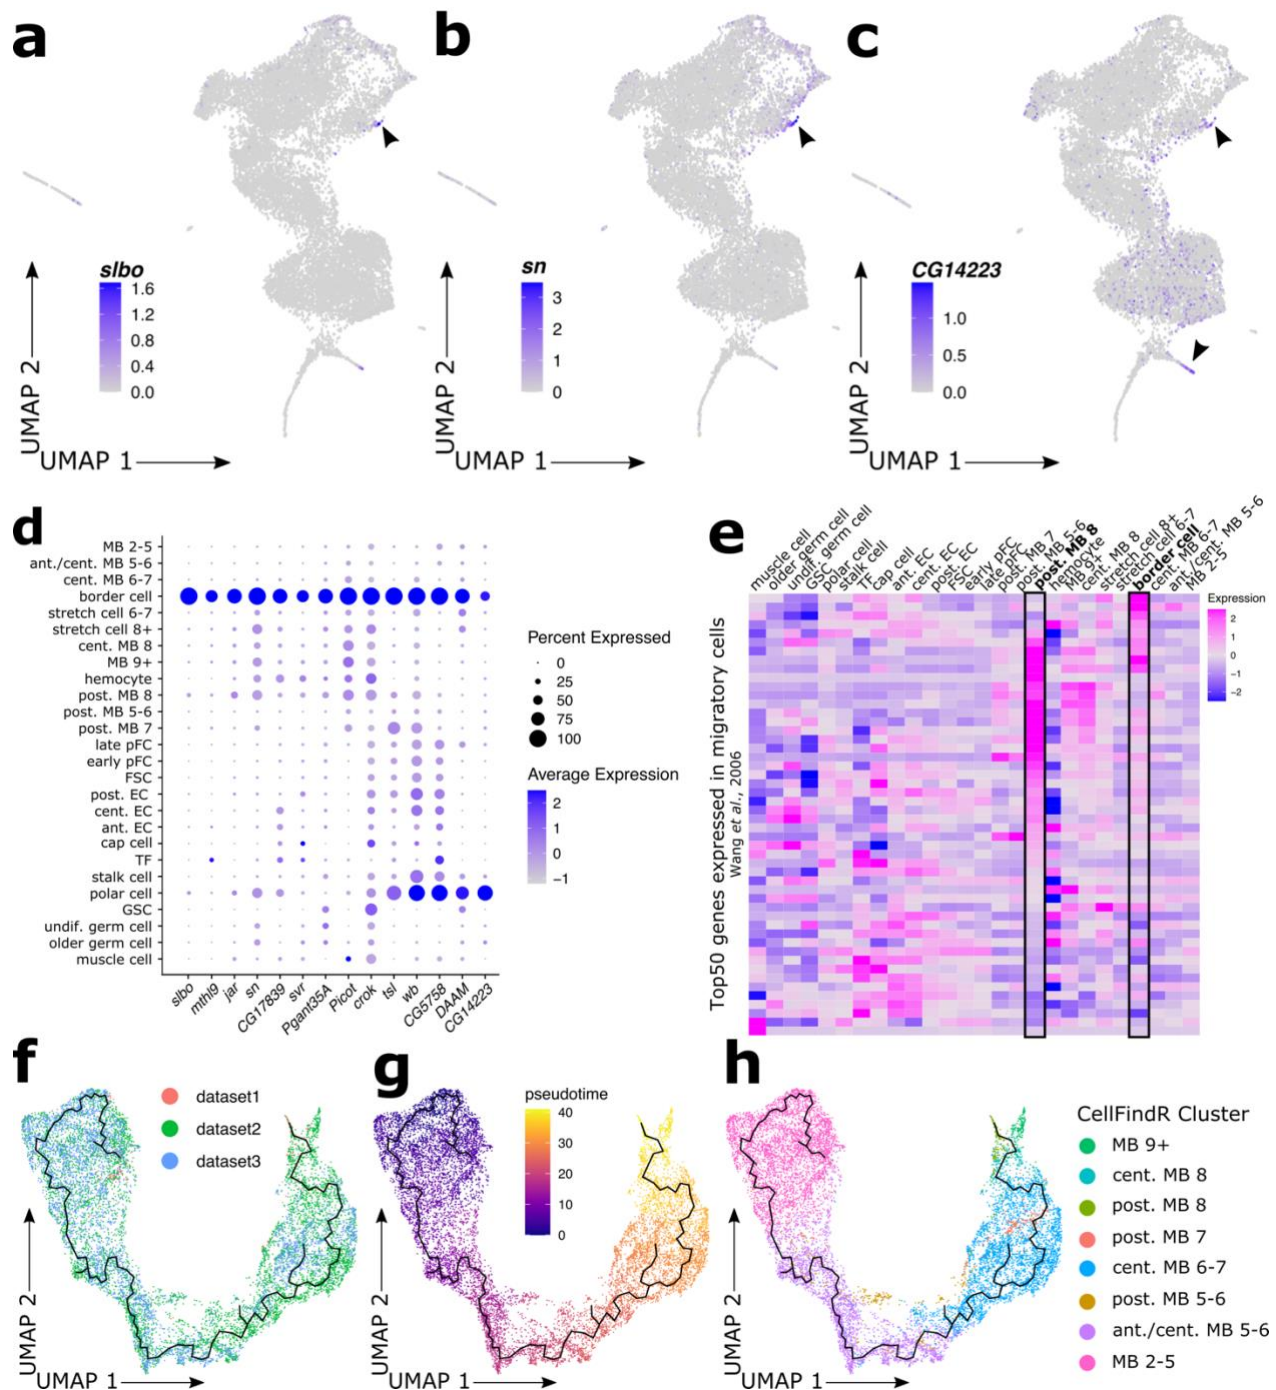

**Supplementary Figure 8: Border cells and monocle3 analysis of main body follicle cells**

a-d) UMAP plots (a-c) and a dot plot (d) showing the expression patterns of markers that are highly specific for the border cell cluster or for border cells and polar cells. Arrows in A-C point at clusters with high expression of the respective marker. e) Heat map showing the expression of the top 100 genes that are most strongly enriched in *slbo-Gal4<sup>7</sup>* expressing cells in each cluster. These genes are enriched in border cells and posterior follicle cells Stage 8 (boxes), as expected given the expression pattern of *slbo-Gal4*.<sup>8</sup> f-h) UMAP plots showing the pseudotime trajectory (black line) of main body follicle cells. The cells are

colored to display the distribution of each dataset across pseudotime (f); the temporal progression (g); and the position of cells in each cluster (h). undif.: undifferentiated; GSC: germline stem cell; TF: terminal filament; EC: escort cell; ant.: anterior; cent.: central; post.: posterior; FSC: follicle stem cell; pFC: prefollicle cell; MB: main body follicle cell.





clones can form during starvation even when Gal4 is repressed by Gal80, indicating that follicle cell clones are not due to expression of *fax-Gal4* in follicle cells. However, fewer follicle cell clones are produced in this condition, suggesting that lower temperature partially suppresses the effect. p-values (two-sided Student's T-test) for comparisons between follicle cell clones (FSC + transient) in rich diet and starved (water):  $p = 0.01$  or rich diet and starved (sucrose):  $p = 0.003$ .  $n = 374$  (rich diet), 424 (starved (water)), 175 (starved (sucrose)), 164 (rich diet 18°C), 309 (starved 18°C) ovarioles. b-c) Germaria with *fax-Gal4* driving G-TRACE<sup>ts</sup> dissected immediately following 24h exposure to indicated diet stained for DAPI (blue), GFP (green), RFP (magenta), and Fas3 (white). b'-c') RFP (white). b) Common expression pattern. c) Rarely observable RFP<sup>+</sup> follicle cells with low signal. Inset: region of interest with twice the pixel intensity used for main image. d) Quantification of Fas3<sup>+</sup> RFP<sup>+</sup> cells. RFP in rare Fas3<sup>+</sup> RFP<sup>+</sup> cell (b) is very dim.  $n = 165$  germaria (rich diet), 126 germaria (starvation). e-f) *fax::GFP* germaria under rich diet (d) and starvation (e) imaged with same settings and stained for DAPI (blue) and Fas3 (magenta). e'-f') *fax::GFP* (white). g) Quantification of *fax-GFP* intensity in germaria with rich diet or starvation. Intensity is significantly reduced upon starvation.  $n=5$  germaria (rich diet), 6 germaria (starvation).  $***p = 2 \times 10^{-4}$  (two-sided Student's T-test). Box plots: midline corresponds to median; lower and upper hinges correspond to first and third quartiles; whiskers span smallest and largest values within 1.5 of interquartile range. EC: escort cell; FSC: follicle stem cell; rd: rich diet; stv: starved; suc: sucrose.

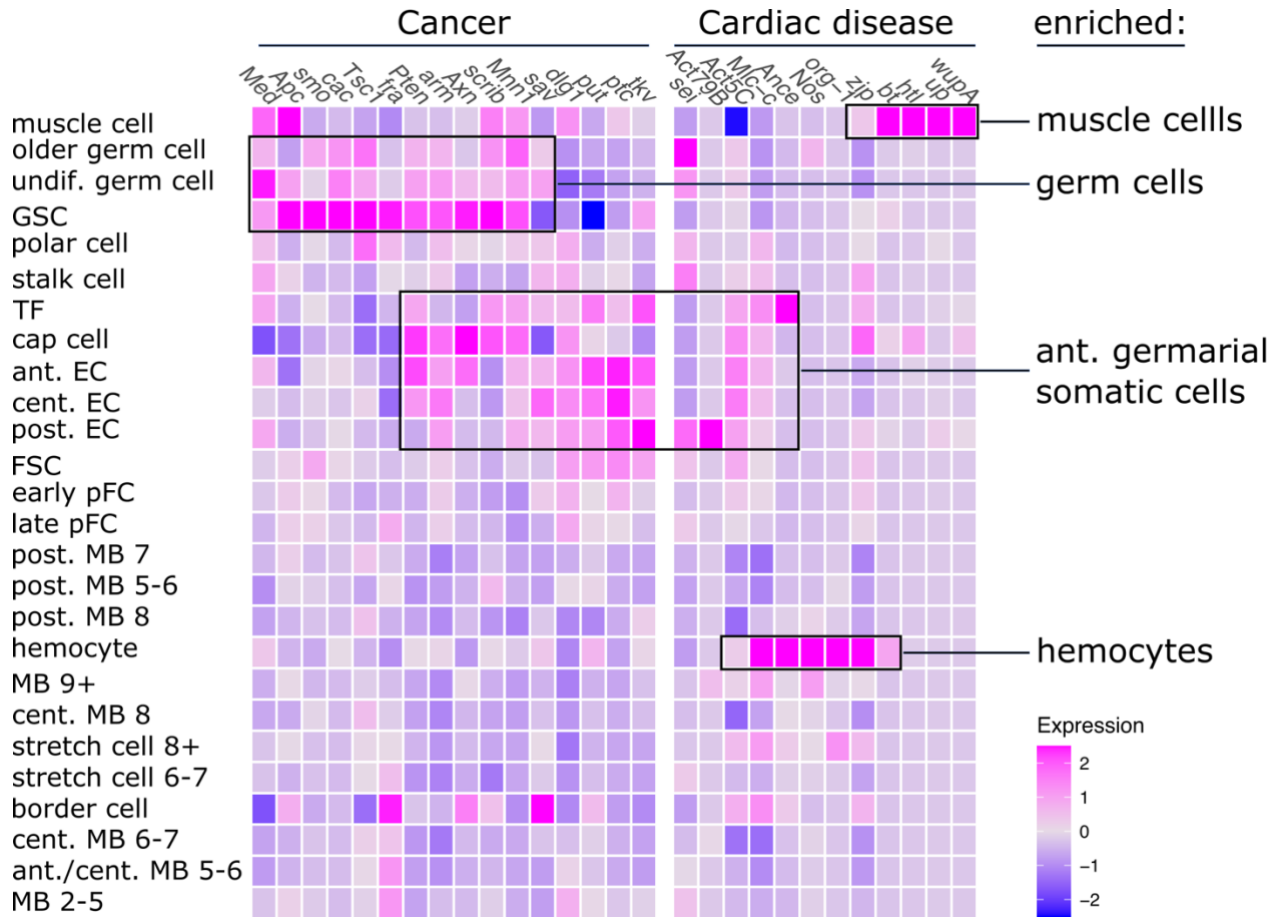

**Supplementary Figure 10: Drosophila ovarian cell types with human disease gene expression profiles**

A Heatmap showing enrichment for cells expressing cancer-associated genes in germ cell clusters, cancer and cardiac disease-associated genes in anterior germarial somatic cell clusters, and cardiac disease-associated genes in muscle cells and hemocytes. undif.: undifferentiated; GSC: germline stem cell; TF: terminal filament; EC: escort cell; ant.: anterior; cent.: central; post.: posterior; FSC: follicle stem cell; pFC: prefollicle cell; MB: main body follicle cell.

**Supplementary Table 1:** Table summarizing the number of high quality cells and the filter settings for each dataset.

|                    | Dataset1      | Dataset2     | Dataset3     | Total |
|--------------------|---------------|--------------|--------------|-------|
| High quality cells | 435           | 8326         | 5412         | 14173 |
| Filter settings    |               |              |              |       |
| nFeature           | 2000 - 6000   | 1000 - 3000  | 1800 - 4000  |       |
| nCount             | 5000 - 210000 | 1000 - 40000 | 2000 - 75000 |       |

**Supplementary Table 2:** CellFindR clustering performance.

|          | Seurat Resolution                    |     |    |    |    |    | CFR | CFR + supervised subclusters |
|----------|--------------------------------------|-----|----|----|----|----|-----|------------------------------|
|          | 0.2                                  | 0.5 | 2  | 3  | 5  | 10 |     |                              |
| Clusters | 7                                    | 14  | 28 | 40 | 56 | 91 | 22  | 26                           |
| marker   | Number of clusters with marked cells |     |    |    |    |    |     |                              |
| Fas2     | 1                                    | >1  | >1 | >1 | >1 | >1 | 1   | 1                            |
| upd1     | <1                                   | <1  | <1 | 1  | 1  | 1  | 1   | 1                            |
| CG46339  | <1                                   | <1  | <1 | <1 | <1 | <1 | 1   | 1                            |
| Mhc      | <1                                   | <1  | 1  | 1  | 1  | 1  | 1   | 1                            |
| en       | <1                                   | <1  | <1 | <1 | <1 | <1 | 1   | 2                            |

Comparison of CellFindR clustering results in combination with or without supervised sub-clustering based on markers identified with monocle3 with Seurat clustering results at 6 different resolution settings for several different cell types with well-defined markers. CFR: CellFindR.

**Supplementary Table 3:** Table listing the number of cells per cluster by dataset.

|                   | Dataset1 | Dataset2 | Dataset3 | Total |
|-------------------|----------|----------|----------|-------|
| MB 2-5            | 160      | 2217     | 2161     | 4538  |
| ant./cent. MB 5-6 | 56       | 1792     | 1360     | 3208  |
| cent. MB 6-7      | 81       | 2609     | 922      | 3612  |
| border cell       | 0        | 6        | 0        | 6     |
| stretch cell 6-7  | 6        | 368      | 143      | 517   |
| stretch cell 8+   | 16       | 267      | 76       | 359   |
| cent. MB 8        | 16       | 177      | 38       | 231   |
| MB 9+             | 11       | 164      | 24       | 199   |
| hemocyte          | 5        | 23       | 0        | 28    |
| post. MB 8        | 42       | 115      | 38       | 195   |
| post. MB 5-6      | 4        | 130      | 75       | 339   |
| post. MB 7        | 1        | 222      | 116      | 209   |
| late pFC          | 4        | 54       | 64       | 122   |
| early pFC         | 1        | 31       | 44       | 76    |
| FSC               | 1        | 24       | 25       | 50    |
| post. EC          | 6        | 26       | 31       | 64    |
| cent. EC          | 0        | 4        | 74       | 78    |
| ant. EC           | 1        | 1        | 32       | 34    |
| cap cell          | 0        | 1        | 4        | 5     |
| TF                | 1        | 0        | 10       | 11    |
| stalk cell        | 3        | 15       | 36       | 54    |
| polar cell        | 5        | 16       | 19       | 40    |
| GSC               | 0        | 3        | 0        | 3     |
| undif. germ cell  | 4        | 16       | 59       | 79    |
| older germ cell   | 5        | 41       | 57       | 103   |
| muscle cell       | 6        | 3        | 4        | 13    |



## Supplementary References

1. Mével-Ninio, M., Fouilloux, E., Guénel, I. & Vincent, A. The three dominant female-sterile mutations of the *Drosophila* ovo gene are point mutations that create new translation-initiator AUG codons. *Development* 122, 4131–4138 (1996).
2. Vied, C., Reilein, A., Field, N. S. & Kalderon, D. Regulation of stem cells by intersecting gradients of long-range niche signals. *Dev. Cell* 23, 836–848 (2012).
3. Assa-Kunik, E., Torres, I., Schejter, E., Johnston, D. & Shilo, B. *Drosophila* follicle cells are patterned by multiple levels of Notch signaling and antagonism between the Notch and JAK/STAT pathways. *Development* 134, 1161–1169 (2007).
4. Wilcockson, S. G. & Ashe, H. L. *Drosophila* Ovarian Germline Stem Cell Cytocensor Projections Dynamically Receive and Attenuate BMP Signaling. *Dev. Cell* 50, 296–312.e5 (2019).
5. Tiwari, M. D., Zeitler, D. M., Meister, G. & Wodarz, A. Molecular profiling of stem cell-like female germ line cells in *Drosophila* delineates networks important for stemness and differentiation. *Biol. Open* 8, (2019).
6. Jia, D., Tamori, Y., Pyrowolakis, G. & Deng, W.-M. Regulation of broad by the Notch pathway affects timing of follicle cell development. *Dev. Biol.* 392, 52–61 (2014).
7. Wang, X. et al. Analysis of cell migration using whole-genome expression profiling of migratory cells in the *Drosophila* ovary. *Dev. Cell* 10, 483–495 (2006).
8. Rørth, P. Gal4 in the *Drosophila* female germline. *Mech. Dev.* 78, 113–118 (1998).
