# Supplementary material for: A single-cell atlas and lineage analysis of the adult Drosophila ovary
Source: PubMed Central journal article supplement (PMC7648648; doi:10.1038/s41467-020-19361-0), 2020-11-06
Supplement: 41467_2020_19361_MOESM15_ESM.pdf [file 41467_2020_19361_MOESM15_ESM.pdf]

**Title: Supplementary Data 1:**

**Description:** DAVID 6.8 GO-term analysis of all cell types using marker genes identified with the CellFindR v2.0.0 get\_stats command with  $p < 0.01$ .

**Title: Supplementary Data 2:**

**Description:** Summary of relevant GO-terms identified with DAVID 6.8 with explanation.

**Title: Supplementary Data 3:**

**Description:** CellFindR output listing the top 50 markers per cluster. This table was created using the CellFindR v2.0.0 get\_maxtrix command.

**Title: Supplementary Data 4:**

**Description:** CellFindR output listing all differentially expressed genes. This table was created using the CellFindR v2.0.0 get\_stats command.

**Title: Supplementary Data 5:**

**Description:** Seurat output listing all differentially expressed genes. This table was created using the Seurat v3.1.5 FindAllMarker command.

**Title: Supplementary Data 6:**

**Description:** Active regulons per cell type in dataset2. This table was created with SCENIC v1.1.2-2.

**Title: Supplementary Data 7:**

**Description:** Active regulons per cell type in dataset3. This table was created with SCENIC v1.1.2-2.

**Title: Supplementary Data 8:**

**Description:** Candidate genes changing expression in germ cell pseudotime identified by monocle3. This table was created using the monocle3 v0.2.1 graph\_test command.

**Title: Supplementary Data 9:**

**Description:** Genes shared among EC subtypes. This table contains genes with p-value  $< 0.01$  expressed in all EC subtypes and was created using the CellFindR v2.0.0 get\_matrix command.

**Title: Supplementary Data 10:**

**Description:** Candidate genes changing expression in FSC and pFC pseudotime identified by monocle3. This table was created using the monocle3 v0.2.1 graph\_test command.

**Title: Supplementary Data 11:**

**Description:** Candidate genes changing expression in main body follicle cell pseudotime identified by monocle3. This table was created using the monocle3 v0.2.1 graph\_test command.

**Title: Supplementary Data 12:**

**Description:** Means and standard errors of the mean (S.E.M.) for all plots with stacked bars.

**Title: Supplementary Software**

**Description:**

**File 1:** R scripts used to produce plots and perform statistical analysis.

**File 2:** Seurat v3.1.5 script used for filtering and clustering.

**File 3:** monocle3 script used for pseudotime analysis.

**File 4:** SCENIC script used for analysis of gene regulatory networks
